# Supplementary material
Source: HighWire-hosted journal article supplement (http://www.jneurosci.org/highwire/filestream/600125/field_highwire_adjunct_files/2/Figure_S3.pdf)
Supplement: Figure_S3.pdf [file Figure_S3.pdf]

**A**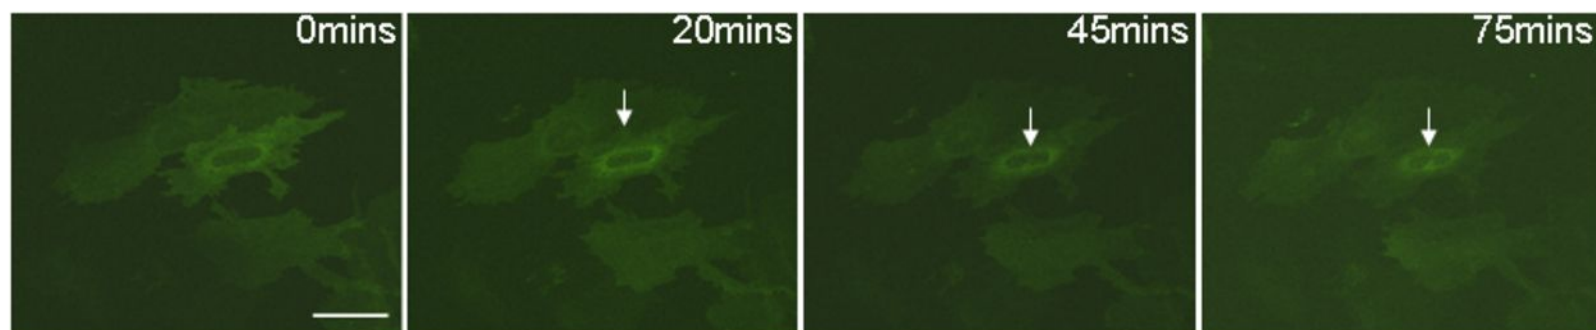**B**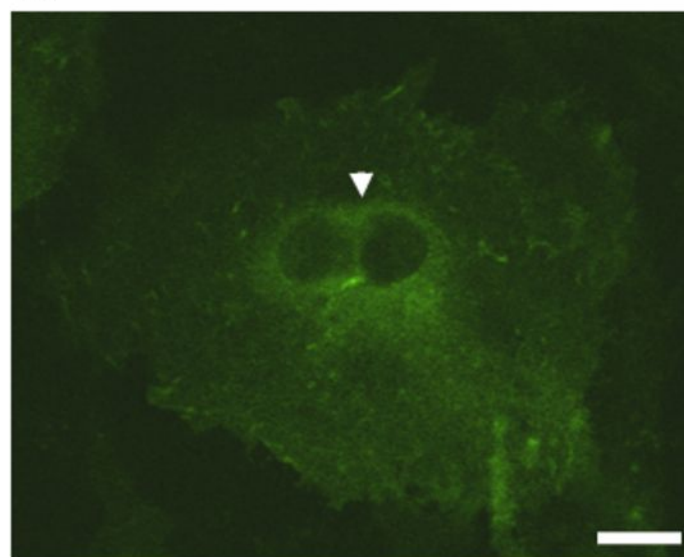**C**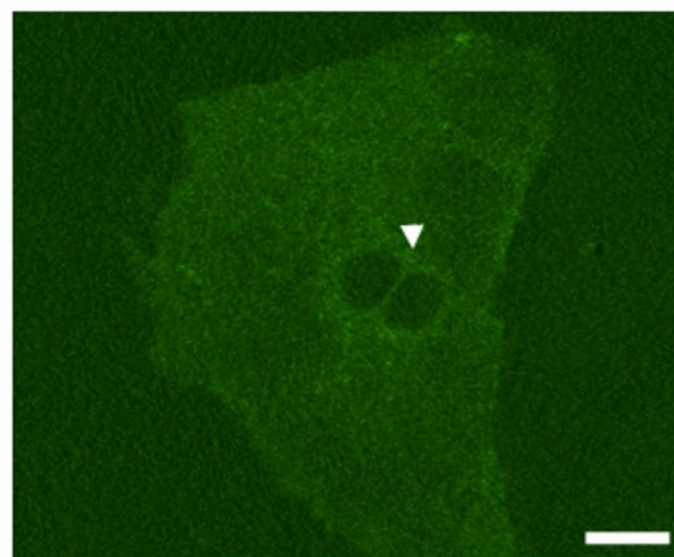

*Supplementary Fig 3. (A):* Nuclear splits were quantified as a measure of cell proliferation. Activated microglia expressing exogenous constructs (P2X7R-EGFP or P2X7RG345Y-EGFP) with lines of separation (arrow) in their nuclei were often monitored with time-lapse microscopy for a period of up to 75 minutes (times indicated on each panel) confirming nuclear splitting rather than nuclear fusion. Scale bar: 20 $\mu$ m. *(B&C):* Representative images showing the occurrence of nuclear splitting in activated microglia expressing P2X7R-EGFP *(B)* or P2X7RG345Y-EGFP *(C)*. Scale bar, 10 $\mu$ m.
